# Erratum

Wehr E, Pilz S, Boehm BO, Grammer TB, März W, Obermayer-Pietsch B. Low free testosterone levels are associated with all-cause and cardiovascular mortality in postmenopausal diabetic women. *Diabetes Care* 2011;34:1771–1777

In Tables 1 and 2 of the article listed above, the free testosterone (FT) quartiles (Qs) for all-cause and cardiovascular mortality should have been Q1 ( $<0.0057$  ng/mL), Q2 ( $0.0057$ – $0.0093$  ng/mL), Q3 ( $0.0093$ – $0.0138$  ng/mL), and Q4 ( $>0.0138$  ng/mL) rather than Q1 ( $<0.57$  ng/mL), Q2 ( $0.57$ – $0.93$  ng/mL), Q3 ( $0.93$ – $1.38$  ng/mL), and Q4 ( $>1.38$  ng/mL), respectively. In addition, the FT Qs in Supplementary Table 1 should have been Q1 ( $<0.0057$  ng/mL), Q2 ( $0.0057$ – $0.0093$  ng/mL), Q3 ( $0.0093$ – $0.0138$  ng/mL), and Q4 ( $>0.0138$  ng/mL) rather than Q1 ( $<0.57$  ng/mL), Q2 ( $0.57$ – $0.93$  ng/mL), Q3 ( $0.93$ – $1.38$  ng/mL), and Q4 ( $>1.38$  ng/mL), respectively. The online version of the article reflects these changes.
